# Supplementary material
Source: Research Square preprint supplement (doi:10.21203/rs.3.rs-9161755/v1)
Supplement: Supplementary file 1 [file 3123dfda070cad1e12b91c7a.docx]

**Supplementary Information**

Supplementary Table S1.Effects of source verification label on message engagement intentions, attitudes, and behavioral intentions via information credibility (H1/H2).

| **Outcome variable: Information credibility** | | | | | | | | | | | | | |
| --- | --- | --- | --- | --- | --- | --- | --- | --- | --- | --- | --- | --- | --- |
| **Model Summary** | ***R*** | ***R-sq*** | ***MSE*** | | ***F(HC3)*** | | | ***df1*** | | ***df2*** | | ***p*** | |
|  | 0.18 | 0.03 | 2.10 | | 4.20 | | | 2 | | 272 | | .016 | |
|  |  |  |  | |  | | |  | |  | |  | |
|  | | | | ***coeff*** | | ***se(HC3)*** | ***t*** | | ***p*** | | ***LLCI*** | | ***ULCI*** |
| Constant | | | | 3.75 | | 0.16 | 23.49 | | <.001 | | 3.43 | | 4.06 |
| Source verification label | | | | -0.08 | | 0.18 | -0.43 | | .667 | | -0.42 | | 0.27 |
| Message accuracy label (control variable) | | | | -0.31 | | 0.11 | -2.88 | | .004 | | -0.52 | | -0.10 |
|  | | | |  | |  |  | |  | |  | |  |
| **Outcome variable: Message engagement intentions** | | | | | | | | | | | | | |
| **Model Summary** | ***R*** | ***R-sq*** | ***MSE*** | | ***F(HC3)*** | | | ***df1*** | | ***df2*** | | ***p*** | |
|  | 0.15 | 0.02 | 1.67 | | 2.91 | | | 2 | | 272 | | .056 | |
|  |  |  |  | |  | | |  | |  | |  | |
|  | | | | ***coeff*** | | ***se(HC3)*** | ***t*** | | ***p*** | | ***LLCI*** | | ***ULCI*** |
| Constant | | | | 2.43 | | 0.16 | 15.49 | | <.001 | | 2.12 | | 2.74 |
| Source verification label | | | | -0.19 | | 0.16 | -1.22 | | .225 | | -0.50 | | 0.12 |
| Message accuracy label (control variable) | | | | -0.20 | | 0.10 | -2.10 | | .037 | | -0.39 | | -0.01 |
|  | | | |  | |  |  | |  | |  | |  |
| Indirect effect (bootstrapped) | | | | -0.04 | | 0.09 |  | |  | | -0.21 | | 0.13 |
| **Outcome variable: Attitudes** | | | | | | | | | | | | | |
| **Model Summary** | ***R*** | ***R-sq*** | ***MSE*** | | ***F(HC3)*** | | | ***df1*** | | ***df2*** | | ***p*** | |
|  | 0.25 | 0.06 | 1.32 | | 8.31 | | | 2 | | 272 | | <.001 | |
|  |  |  |  | |  | | |  | |  | |  | |
|  | | | | ***coeff*** | | ***se(HC3)*** | ***t*** | | ***p*** | | ***LLCI*** | | ***ULCI*** |
| Constant | | | | 4.05 | | 0.13 | 30.27 | | <.001 | | 3.78 | | 4.31 |
| Source verification label | | | | -0.05 | | 0.14 | -0.35 | | .730 | | -0.32 | | 0.23 |
| Message accuracy label (control variable) | | | | -0.35 | | 0.09 | -4.06 | | <.001 | | -0.53 | | -0.18 |
|  | | | |  | |  |  | |  | |  | |  |
| Indirect effect (bootstrapped) | | | | -0.05 | | 0.10 |  | |  | | -0.25 | | 0.17 |
| **Outcome variable: Behavioral intentions** | | | | | | | | | | | | | |
| **Model Summary** | ***R*** | ***R-sq*** | ***MSE*** | | ***F(HC3)*** | | | ***df1*** | | ***df2*** | | ***p*** | |
|  | 0.19 | 0.04 | 2.21 | | 5.01 | | | 2 | | 272 | | .007 | |
|  |  |  |  | |  | | |  | |  | |  | |
|  | | | | ***coeff*** | | ***se(HC3)*** | ***t*** | | ***p*** | | ***LLCI*** | | ***ULCI*** |
| Constant | | | | 2.85 | | 0.18 | 16.02 | | <.001 | | 2.50 | | 3.20 |
| Source verification label | | | | -0.03 | | 0.18 | -0.17 | | .869 | | -0.39 | | 0.33 |
| Message accuracy label (control variable) | | | | -0.35 | | 0.11 | -3.17 | | .002 | | -0.56 | | -0.13 |
|  | | | |  | |  |  | |  | |  | |  |
| Indirect effect (bootstrapped) | | | | -0.05 | | 0.12 |  | |  | | -0.28 | | 0.18 |

*Note.* The table presents the total effects.

Supplementary Table S2.Effects of message accuracy label on message engagement intentions, attitudes, and behavioral intentions via information credibility (H3/H4).

| **Outcome variable: Information credibility** | | | | | | | | | | | | | |
| --- | --- | --- | --- | --- | --- | --- | --- | --- | --- | --- | --- | --- | --- |
| **Model Summary** | ***R*** | ***R-sq*** | ***MSE*** | | ***F(HC3)*** | | | ***df1*** | | ***df2*** | | ***p*** | |
|  | 0.18 | 0.03 | 2.10 | | 3.00 | | | 3 | | 271 | | .031 | |
|  |  |  |  | |  | | |  | |  | |  | |
|  | | | | ***coeff*** | | ***se(HC3)*** | ***t*** | | ***p*** | | ***LLCI*** | | ***ULCI*** |
| Constant | | | | 3.44 | | 0.12 | 28.15 | | <.001 | | 3.20 | | 3.68 |
| Message accuracy label (a) | | | | -0.37 | | 0.18 | -2.05 | | .041 | | -0.73 | | -0.01 |
| Message accuracy label (b) | | | | -0.48 | | 0.22 | -2.19 | | .029 | | -0.92 | | -0.05 |
| Source verification label (control variable) | | | | -0.07 | | 0.18 | -0.41 | | .681 | | -0.42 | | 0.27 |
|  | | | |  | |  |  | |  | |  | |  |
| **Outcome variable: Message engagement intentions** | | | | | | | | | | | | | |
| **Model Summary** | ***R*** | ***R-sq*** | ***MSE*** | | ***F(HC3)*** | | | ***df1*** | | ***df2*** | | ***p*** | |
|  | 0.15 | 0.02 | 1.67 | | 1.93 | | | 3 | | 271 | | .124 | |
|  |  |  |  | |  | | |  | |  | |  | |
|  | | | | ***coeff*** | | ***se(HC3)*** | ***t*** | | ***p*** | | ***LLCI*** | | ***ULCI*** |
| Constant | | | | 2.23 | | 0.12 | 18.71 | | <.001 | | 1.99 | | 2.46 |
| Message accuracy label (a) | | | | -0.30 | | 0.17 | -1.79 | | .075 | | -0.64 | | 0.03 |
| Message accuracy label (b) | | | | -0.20 | | 0.19 | -1.06 | | .292 | | -0.57 | | 0.17 |
| Source verification label (control variable) | | | | -0.19 | | 0.16 | -1.21 | | .227 | | -0.50 | | 0.12 |
|  | | | |  | |  |  | |  | |  | |  |
| Indirect effect (bootstrapped)   Message accuracy label (a) | | | | -0.19 | | 0.09 |  | |  | | -0.36 | | -0.01 |
| Indirect effect (bootstrapped)  Message accuracy label (b) | | | | -0.24 | | 0.11 |  | |  | | -0.47 | | -0.03 |
| **Outcome variable: Attitudes** | | | | | | | | | | | | | |
| **Model Summary** | ***R*** | ***R-sq*** | ***MSE*** | | ***F(HC3)*** | | | ***df1*** | | ***df2*** | | ***p*** | |
|  | 0.25 | 0.06 | 1.32 | | 5.78 | | | 3 | | 271 | | <.001 | |
|  |  |  |  | |  | | |  | |  | |  | |
|  | | | | ***coeff*** | | ***se(HC3)*** | ***t*** | | ***p*** | | ***LLCI*** | | ***ULCI*** |
| Constant | | | | 3.69 | | 0.10 | 35.27 | | <.001 | | 3.49 | | 3.90 |
| Message accuracy label (a) | | | | -0.46 | | 0.15 | -3.09 | | .002 | | -0.75 | | -0.17 |
| Message accuracy label (b) | | | | -0.50 | | 0.17 | -2.94 | | .004 | | -0.84 | | -0.17 |
| Source verification label (control variable) | | | | -0.05 | | 0.14 | -0.33 | | .745 | | -0.32 | | 0.23 |
|  | | | |  | |  |  | |  | |  | |  |
| Indirect effect (bootstrapped)   Message accuracy label (a) | | | | -0.22 | | 0.11 |  | |  | | -0.44 | | -0.01 |
| Indirect effect (bootstrapped)   Message accuracy label (b) | | | | -0.29 | | 0.13 |  | |  | | -0.56 | | -0.04 |
| **Outcome variable: Behavioral intentions** | | | | | | | | | | | | | |
| **Model Summary** | ***R*** | ***R-sq*** | ***MSE*** | | ***F(HC3)*** | | | ***df1*** | | ***df2*** | | ***p*** | |
|  | 0.19 | 0.04 | 2.22 | | 3.37 | | | 3 | | 271 | | .019 | |
|  |  |  |  | |  | | |  | |  | |  | |
|  | | | | ***coeff*** | | ***se(HC3)*** | ***t*** | | ***p*** | | ***LLCI*** | | ***ULCI*** |
| Constant | | | | 2.51 | | 0.13 | 19.14 | | <.001 | | 2.25 | | 2.76 |
| Message accuracy label (a) | | | | -0.50 | | 0.20 | -2.56 | | .011 | | -0.89 | | -0.12 |
| Message accuracy label (b) | | | | -0.38 | | 0.22 | -1.77 | | .078 | | -0.81 | | 0.04 |
| Source verification label (control variable) | | | | -0.03 | | 0.18 | -0.16 | | .873 | | -0.39 | | 0.33 |
|  | | | |  | |  |  | |  | |  | |  |
| Indirect effect (bootstrapped)   Message accuracy label (a) | | | | -0.26 | | 0.13 |  | |  | | -0.51 | | -0.01 |
| Indirect effect (bootstrapped)  Message accuracy label (b) | | | | -0.33 | | 0.15 |  | |  | | -0.64 | | -0.03 |

*Note.* The table presents the total effects. Message accuracy label (a) = absence vs. presence of a message accuracy label. Message accuracy label (b) = accuracy prompt vs. refutational fact-check label.

Supplementary Table S3.Interaction effects of source verification label and message accuracy label on message engagement intentions, attitudes, and behavioral intentions via information credibility (RQ1/RQ2).

| **Outcome variable: Information credibility** | | | | | | | | | | | | | |
| --- | --- | --- | --- | --- | --- | --- | --- | --- | --- | --- | --- | --- | --- |
| **Model Summary** | ***R*** | ***R-sq*** | ***MSE*** | | ***F(HC3)*** | | | ***df1*** | | ***df2*** | | ***p*** | |
|  | 0.19 | 0.04 | 2.11 | | 1.87 | | | 5 | | 269 | | .099 | |
|  |  |  |  | |  | | |  | |  | |  | |
|  | | | | ***coeff*** | | ***se(HC3)*** | ***t*** | | ***p*** | | ***LLCI*** | | ***ULCI*** |
| Constant | | | | 3.44 | | 0.12 | 27.98 | | <.001 | | 3.20 | | 3.68 |
| Source verification label | | | | -0.07 | | 0.18 | -0.39 | | .697 | | -0.42 | | 0.28 |
| Message accuracy label (a) | | | | -0.41 | | 0.26 | -1.57 | | .117 | | -0.91 | | 0.10 |
| Message accuracy label (b) | | | | -0.30 | | 0.30 | -0.98 | | .326 | | -0.90 | | 0.30 |
| Interaction effect (a) | | | | 0.07 | | 0.37 | 0.19 | | .849 | | -0.65 | | 0.79 |
| Interaction effect (b) | | | | -0.36 | | 0.44 | -0.82 | | .415 | | -1.24 | | 0.51 |
|  | | | |  | |  |  | |  | |  | |  |
| **Outcome variable: Message engagement intentions** | | | | | | | | | | | | | |
| **Model Summary** | ***R*** | ***R-sq*** | ***MSE*** | | ***F(HC3)*** | | | ***df1*** | | ***df2*** | | ***p*** | |
|  | 0.15 | 0.02 | 1.68 | | 1.19 | | | 5 | | 269 | | .314 | |
|  |  |  |  | |  | | |  | |  | |  | |
|  | | | | ***coeff*** | | ***se(HC3)*** | ***t*** | | ***p*** | | ***LLCI*** | | ***ULCI*** |
| Constant | | | | 2.23 | | 0.12 | 18.58 | | <.001 | | 1.99 | | 2.46 |
| Source verification label | | | | -0.19 | | 0.16 | -1.20 | | .233 | | -0.50 | | 0.12 |
| Message accuracy label (a) | | | | -0.38 | | 0.26 | -1.45 | | .150 | | -0.89 | | 0.14 |
| Message accuracy label (b) | | | | -0.13 | | 0.29 | -0.47 | | .640 | | -0.69 | | 0.43 |
| Interaction effect (a) | | | | 0.15 | | 0.34 | 0.42 | | .674 | | -0.53 | | 0.82 |
| Interaction effect (b) | | | | -0.13 | | 0.38 | -0.35 | | .730 | | -0.88 | | 0.62 |
|  | | | |  | |  |  | |  | |  | |  |
| Indirect interaction effect (bootstrapped) (a) | | | | 0.03 | | 0.18 |  | |  | | -0.31 | | 0.40 |
| Indirect interaction effect (bootstrapped) (b) | | | | -0.18 | | 0.22 |  | |  | | -0.62 | | 0.25 |
| **Outcome variable: Attitudes** | | | | | | | | | | | | | |
| **Model Summary** | ***R*** | ***R-sq*** | ***MSE*** | | ***F(HC3)*** | | | ***df1*** | | ***df2*** | | ***p*** | |
|  | 0.26 | 0.07 | 1.32 | | 3.69 | | | 5 | | 269 | | .003 | |
|  |  |  |  | |  | | |  | |  | |  | |
|  | | | | ***coeff*** | | ***se(HC3)*** | ***t*** | | ***p*** | | ***LLCI*** | | ***ULCI*** |
| Constant | | | | 3.69 | | 0.11 | 35.06 | | <.001 | | 3.49 | | 3.90 |
| Source verification label | | | | -0.04 | | 0.14 | -0.31 | | .760 | | -0.32 | | 0.23 |
| Message accuracy label (a) | | | | -0.53 | | 0.22 | -2.38 | | .018 | | -0.96 | | -0.09 |
| Message accuracy label (b) | | | | -0.36 | | 0.26 | -1.36 | | .174 | | -0.87 | | 0.16 |
| Interaction effect (a) | | | | 0.14 | | 0.30 | 0.47 | | .636 | | -0.44 | | 0.73 |
| Interaction effect (b) | | | | -0.29 | | 0.34 | -0.84 | | .401 | | -0.96 | | 0.39 |
|  | | | |  | |  |  | |  | |  | |  |
| Indirect interaction effect (bootstrapped) (a) | | | | 0.04 | | 0.22 |  | |  | | -0.40 | | 0.48 |
| Indirect interaction effect (bootstrapped) (b) | | | | -0.22 | | 0.27 |  | |  | | -0.74 | | 0.30 |
| **Outcome variable: Behavioral intentions** | | | | | | | | | | | | | |
| **Model Summary** | ***R*** | ***R-sq*** | ***MSE*** | | ***F(HC3)*** | | | ***df1*** | | ***df2*** | | ***p*** | |
|  | 0.19 | 0.04 | 2.24 | | 2.01 | | | 5 | | 269 | | .077 | |
|  |  |  |  | |  | | |  | |  | |  | |
|  | | | | ***coeff*** | | ***se(HC3)*** | ***t*** | | ***p*** | | ***LLCI*** | | ***ULCI*** |
| Constant | | | | 2.51 | | 0.13 | 19.00 | | <.001 | | 2.25 | | 2.77 |
| Source verification label | | | | -0.03 | | 0.18 | -0.15 | | .880 | | -0.39 | | 0.33 |
| Message accuracy label (a) | | | | -0.49 | | 0.29 | -1.67 | | .095 | | -1.06 | | 0.86 |
| Message accuracy label (b) | | | | -0.31 | | 0.31 | -0.98 | | .330 | | -0.92 | | 0.31 |
| Interaction effect (a) | | | | -0.03 | | 0.40 | -0.08 | | .937 | | -0.81 | | 0.75 |
| Interaction effect (b) | | | | -0.16 | | 0.44 | -0.36 | | .716 | | -1.02 | | 0.70 |
|  | | | |  | |  |  | |  | |  | |  |
| Indirect interaction effect (bootstrapped) (a) | | | | 0.05 | | 0.25 |  | |  | | -0.44 | | 0.52 |
| Indirect interaction effect (bootstrapped) (b) | | | | -0.25 | | 0.31 |  | |  | | -0.87 | | 0.35 |

*Note.* The table presents the total effects. As these statistics were not provided with PROCESS Model 8, we estimated the total effects using PROCESS Model 1. Message accuracy label (a) = absence vs. presence of a message accuracy label. Message accuracy label (b) = accuracy prompt vs. refutational fact-check label. Interaction effect (a) = the interaction between source verification label and message accuracy label (a). Interaction effect (b) = the interaction between source verification label and message accuracy label (b).

Supplementary Table S4.Means and standard deviations per condition.

|  |  | Information credibility | | Message engagement  intentions | | Attitudes | | Behavioral intentions | |  |
| --- | --- | --- | --- | --- | --- | --- | --- | --- | --- | --- |
|  |  | *M* | *SD* | *M* | *SD* | *M* | *SD* | *M* | *SD* | *n* |
| Source label: absent | |  |  |  |  |  |  |  |  |  |
|  | No message label | 3.71 | 1.38 | 2.48 | 1.45 | 4.04 | 1.19 | 2.83 | 1.62 | 45 |
|  | Accuracy prompt | 3.46 | 1.41 | 2.17 | 1.34 | 3.70 | 1.19 | 2.50 | 1.54 | 45 |
|  | Fact-check | 3.16 | 1.45 | 2.03 | 1.33 | 3.34 | 1.25 | 2.19 | 1.37 | 45 |
|  | Total | 3.44 | 1.42 | 2.23 | 1.38 | 3.69 | 1.24 | 2.51 | 1.53 | 135 |
| Source label: present | |  |  |  |  |  |  |  |  |  |
|  | No message label | 3.60 | 1.38 | 2.19 | 1.26 | 3.91 | 1.11 | 2.82 | 1.49 | 47 |
|  | Accuracy prompt | 3.59 | 1.48 | 2.09 | 1.19 | 3.84 | 0.94 | 2.54 | 1.46 | 44 |
|  | Fact-check | 2.93 | 1.59 | 1.83 | 1.19 | 3.20 | 1.19 | 2.07 | 1.48 | 49 |
|  | Total | 3.36 | 1.51 | 2.03 | 1.22 | 3.64 | 1.13 | 2.47 | 1.50 | 140 |
| Total | |  |  |  |  |  |  |  |  |  |
|  | No message label | 3.65 | 1.37 | 2.33 | 1.36 | 3.97 | 1.15 | 2.83 | 1.55 | 92 |
|  | Accuracy prompt | 3.52 | 1.44 | 2.13 | 1.26 | 3.77 | 1.07 | 2.52 | 1.49 | 89 |
|  | Fact-check | 3.04 | 1.52 | 1.93 | 1.26 | 3.27 | 1.21 | 2.13 | 1.42 | 94 |

**Supplementary Note 1: Exploratory Analyses**

Additional analyses were performed to explore the participants’ perceived usefulness of source and message labels. Overall, participants rated all labels as useful, but a repeated measures ANOVA (with Huynh-Feldt correction) showed differences between the label types, *F* (1.65, 452.36) = 14.05, *p* < .001, η² = .05. On average, the refutational fact-check received the highest scores on perceived usefulness (*M* = 5.64, *SD* = 1.38), followed by the accuracy prompt with almost similar scores (*M* = 5.60, *SD* = 1.27). Among the three label types, the source verification label received the lowest average scores on perceived usefulness, but still above the midpoint of 4 (*M* = 5.20, *SD* = 1.58).

**Supplementary Note 2: Full Scales**

**Information credibility**

To what extent do you agree with the following statements?

- The information in the Instagram video is credible
- The information in the Instagram video is believable

*Answer options range from 1 (Strongly disagree) to 7 (Strongly agree)*

**Message engagement intentions**

To what extent do you agree with the following statements?

- If this video appeared on my Instagram feed, I would “like” it
- If this video appeared on my Instagram feed, I would “share” it with others

*Answer options range from 1 (Strongly disagree) to 7 (Strongly agree)*

**Message persuasion: Attitudes**

In the Instagram video, specific recommendations are given regarding the sequence in which different food groups (vegetables, proteins, and carbohydrates) should be consumed during a meal.

I think the advice in the Instagram video is:

- *Very bad _ _ _ _ _ _ _ Very good*
- *Very foolish _ _ _ _ _ _ _ Very wise*
- *Very unfavorable _ _ _ _ _ _ _ Very favorable*
- *Very unnecessary _ _ _ _ _ _ _ Very necessary*
- *Very unattractive _ _ _ _ _ _ _ Very attractive*
- *Very harmful _ _ _ _ _ _ _ Very helpful*

**Message persuasion: Intentions**

To what extent do you agree with the following statements?

- I plan to follow the advice from the Instagram video
- I will try to follow the advice from the Instagram video
- I intend to follow the advice from the Instagram video

*Answer options range from 1 (Strongly disagree) to 7 (Strongly agree)*

**Control variable: Source familiarity**

- Did you recognize the person in the video (before participating in this research)?

*Answer options: Yes / No / I don’t know*

**Control variable: General trust in experts**

To what extent do you agree with the following statement?

- In general, I trust experts

*Answer options range from 1 (Strongly disagree) to 7 (Strongly agree)*

**Control variable: Subjective nutrition knowledge**

Answer the following questions about your knowledge of nutrition.

- I know pretty much about nutrition
- Among my circle of friends, I'm one of the “experts” on nutrition
- Compared to most other people, I know less about nutrition (reverse scored)
- I do not feel very knowledgeable about nutrition (reverse scored)
- When it comes to nutrition, I really don't know a lot (reverse scored)

*Answer options range from 1 (Strongly disagree) to 7 (Strongly agree)*

**Control variable: Topic involvement**

Answer the following questions about your relationship with food.

- I attach great importance to nutrition
- I am very interested in nutrition
- Nutrition leaves me completely indifferent (reverse scored)

*Answer options range from 1 (Strongly disagree) to 7 (Strongly agree)*

**Control variable: Pre-exposure claim believability**

To what extent do you find the following statement believable?

- When eating a meal, it is wise to eat food groups (vegetables, protein, carbohydrates) in a certain order for a more stable blood sugar level

*Answer options range from 1 (Very unbelievable) to 7 (Very believable)*

**Manipulation checks: Source verification label**

The following questions are about the Instagram profile page you saw earlier and about the video posted by this person.

- Did you see the following information on the Instagram profile and/or in the video (next to the account name of the person who posted the video)? [screenshot of source verification label]

*Answer options: Yes / No / I don’t remember*

To what extent do you agree with the following statement?

- The person behind the Instagram account has been identified as an expert in the field of nutrition

*Answer options range from 1 (Strongly disagree) to 7 (Strongly agree)*

**Manipulation checks: Message accuracy label**

- Did you see any of the following messages while watching the video?

*Answer options: Yes [screenshot of refutational fact-check] / Yes [screenshot of accuracy prompt] / No / I don’t remember*

To what extent do you agree with the following statement?

- The information in the Instagram video has been flagged as incorrect or potentially incorrect

*Answer options range from 1 (Strongly disagree) to 7 (Strongly agree)*

**Exploratory questions: Perceived usefulness of the labels**

In this research, we examined the usefulness of labels that could help distinguish between accurate and inaccurate information on social media

One of these labels provides information about the person behind an Instagram account. The label provides an independent assessment of a person's level of expertise in the field of nutrition. The label could look like this:

[Screenshot of source verification label]

To what extent do you agree with the following statement?

- A label that, based on an independent assessment, indicates whether the person behind an Instagram account has expertise in the field of nutrition, is useful.

*Answer options range from 1 (Strongly disagree) to 7 (Strongly agree)*

Another type of label provides information about the content of a specific Instagram post. This label gives an independent assessment of the (possible) inaccuracy of the information in the video/post.

Such a label could take various forms:

[Screenshot of accuracy prompt]

- A label that, based on an independent assessment, indicates that the information in an Instagram post has not been verified and is therefore potentially incorrect, is useful.

*Answer options range from 1 (Strongly disagree) to 7 (Strongly agree)*

[Screenshot of refutational fact-check]

- A label that, based on an independent assessment by fact-checkers, indicates that the information in an Instagram post has been assessed as incorrect, is useful.

*Answer options range from 1 (Strongly disagree) to 7 (Strongly agree)*
